# Supplementary material
Source: PubMed Central journal article supplement (PMC4326028)
Supplement: Supp_Fig2.pdf [file Supp_Fig2.pdf]

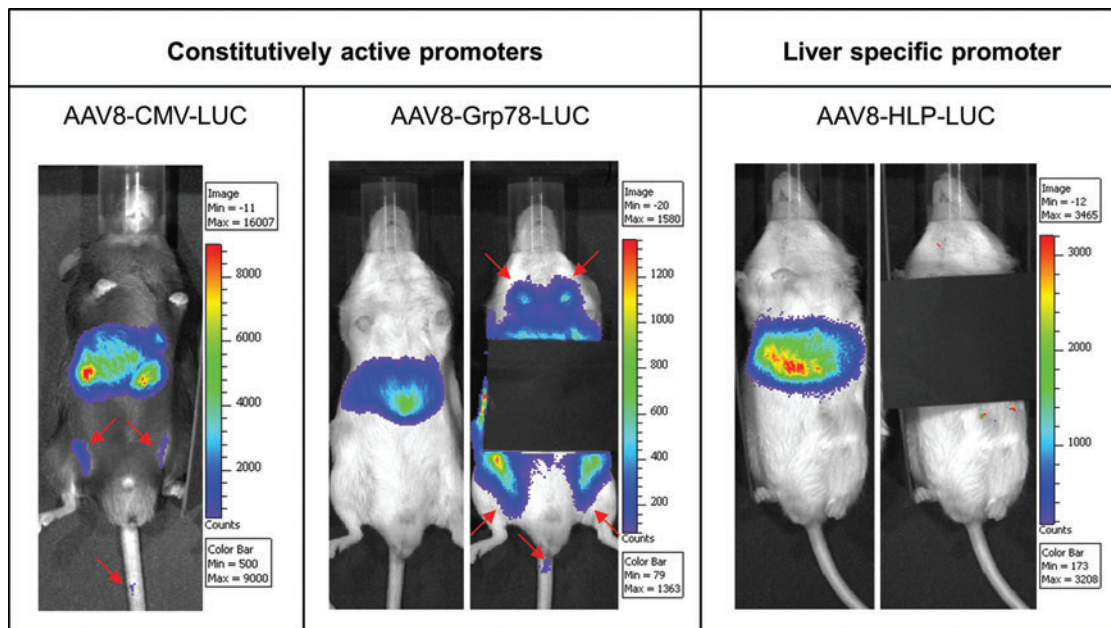

**SUPPLEMENTARY FIG. S2.** Importance of the promoter specificity. We compared three different promoters, cytomegalovirus (CMV), Grp78, and HLP, in the context of AAV8 vectors encoding the firefly luciferase gene. Each of the vector was administered via the tail vein at a dose of  $1 \times 10^{11}$  vg/mouse in three separate cohorts of mice and luciferase activity assessed immediately after administration of D-luciferin using bioluminescence imaging. The CMV immediate early promoter and the glucose-regulated protein 78 (Grp78) promoter are constitutively active promoters and show evidence of luciferase expression in nonhepatic tissues. In contrast, luciferase expression was limited to the liver in mice transduced with AAV8 vector in which transgene expression was under the control of the HLP liver-specific promoter. In these animals, a signal outside of the liver was not observed even when a shield was used to mask the signal from the liver.
