# Supplementary material
Source: PubMed Central journal article supplement (PMC4326028)
Supplement: Supp_Fig3.pdf [file Supp_Fig3.pdf]

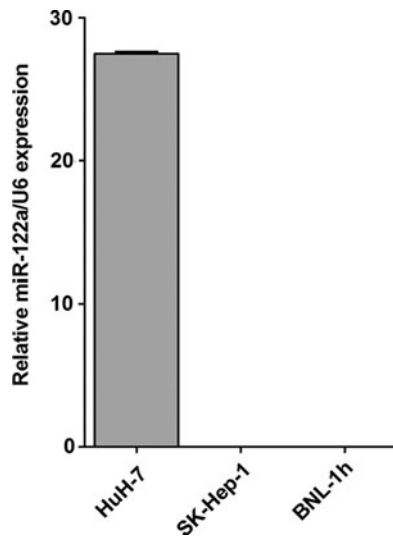

**SUPPLEMENTARY FIG. S3.** *MiR-122a* expression levels in the cell lines. *MiR-122a* levels in HuH7, SK-Hep-1, and BNL-1h cells compared with U6 as control, using a quantitative qPCR analysis.
