# Supplementary material
Source: PubMed Central journal article supplement (PMC4326028)
Supplement: Supp_Fig4.pdf [file Supp_Fig4.pdf]

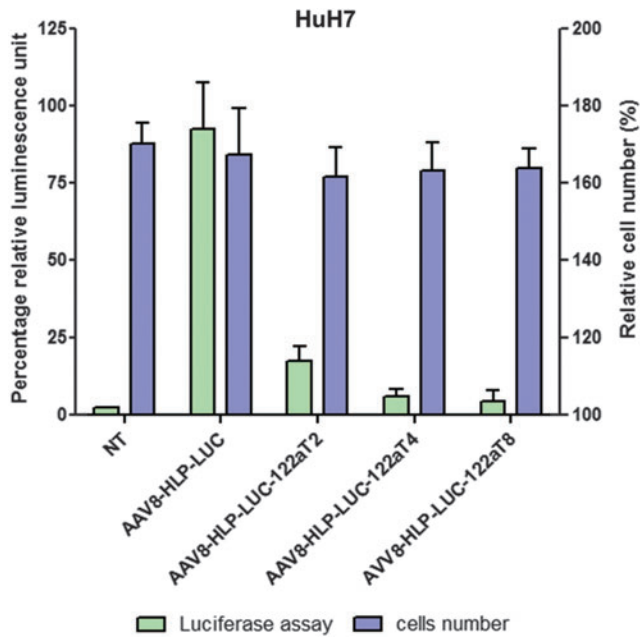

**SUPPLEMENTARY FIG. S4.** Effect of AAV gene transfer with miR-1222aT4 vector on cell proliferation. Cell number and luciferase expression in HuH7 cells was assessed at 4 days after gene transfer with AAV8-HLP-LUC, AAV8-HLP-LUC-122aT2, AAV8-HLP-LUC-122aT4, and AAV8-HLP-LUC-122aT8 vector compared with nontransduced (NT) cells.
