# Supplementary material
Source: PubMed Central journal article supplement (PMC4326028)
Supplement: Supp_Fig5.pdf [file Supp_Fig5.pdf]

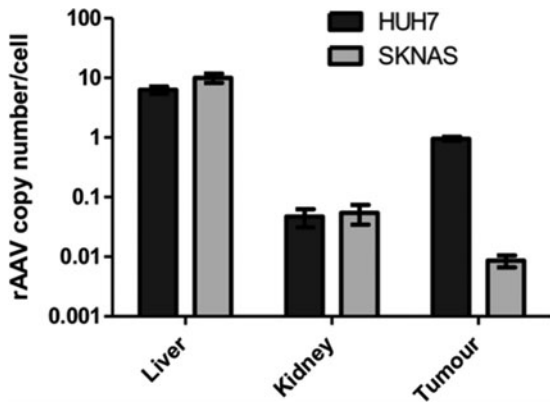

**SUPPLEMENTARY FIG. S5.** Quantitative PCR analysis of proviral copy number in murine tissues isolated 6 weeks after gene transfer. The liver had the highest proviral copy/cell with  $6 \pm 2$  and  $10 \pm 3$  copies/cell, respectively, in the HUH7 and SKNAS tumor cohorts. The transgene copy number in the HUH7 tumor was  $0.9 \pm 0.2$  copies/cell as compared with  $0.01 \pm 0.003$  copies/cell in SKNAS tumor tissue isolated from the subcutaneous space. Transgene copy number in the kidneys of both cohorts was comparable at approximately  $0.05 \pm 0.004$  copies/cells.
