# Supplementary material
Source: PubMed Central journal article supplement (PMC4326028)
Supplement: Supp_Fig6.pdf [file Supp_Fig6.pdf]

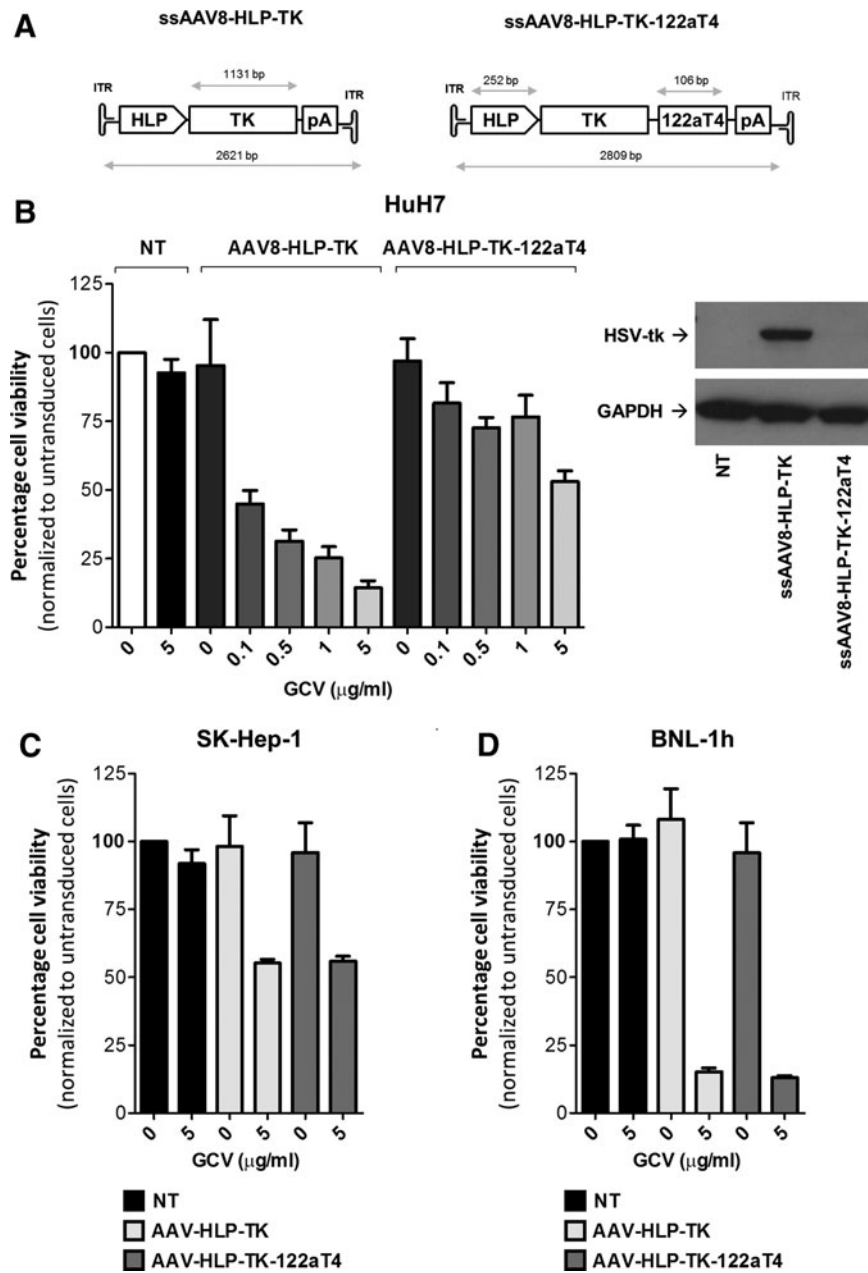

**SUPPLEMENTARY FIG. S6.** *In vitro* assessment of rAAV8 vectors encoding *TK*. (A) The *TK* suicide gene was cloned into our expression cassette to generate AAV-HLP-TK and AAV-HLP-TK-122aT4 (four miR-122a-binding sites). (B) Left panel: Cell viability (percentage of untransduced cells treated with GCV, mean  $\pm$  SD) in HuH7 cells. Right panel: Western blot analysis of HuH7 cells transduced with ssAAV8-HLP-TK or ssAAV8-HLP-TK-122aT4 when compared with untransduced control (NT). (C) SK-Hep-1 and (D) BNL-1h cells following transduction with ssAAV8-HLP-TK and ssAAV8-HLP-TK-122aT4 vector at MOI of  $1 \times 10^5$  ( $n=3$ ). NT = nontransduced, which served as control. GCV was added to the media at the concentration reported on the  $x$ -axis.
