# Supplementary material
Source: PubMed Central journal article supplement (PMC4326028)
Supplement: Supp_Fig7.pdf [file Supp_Fig7.pdf]

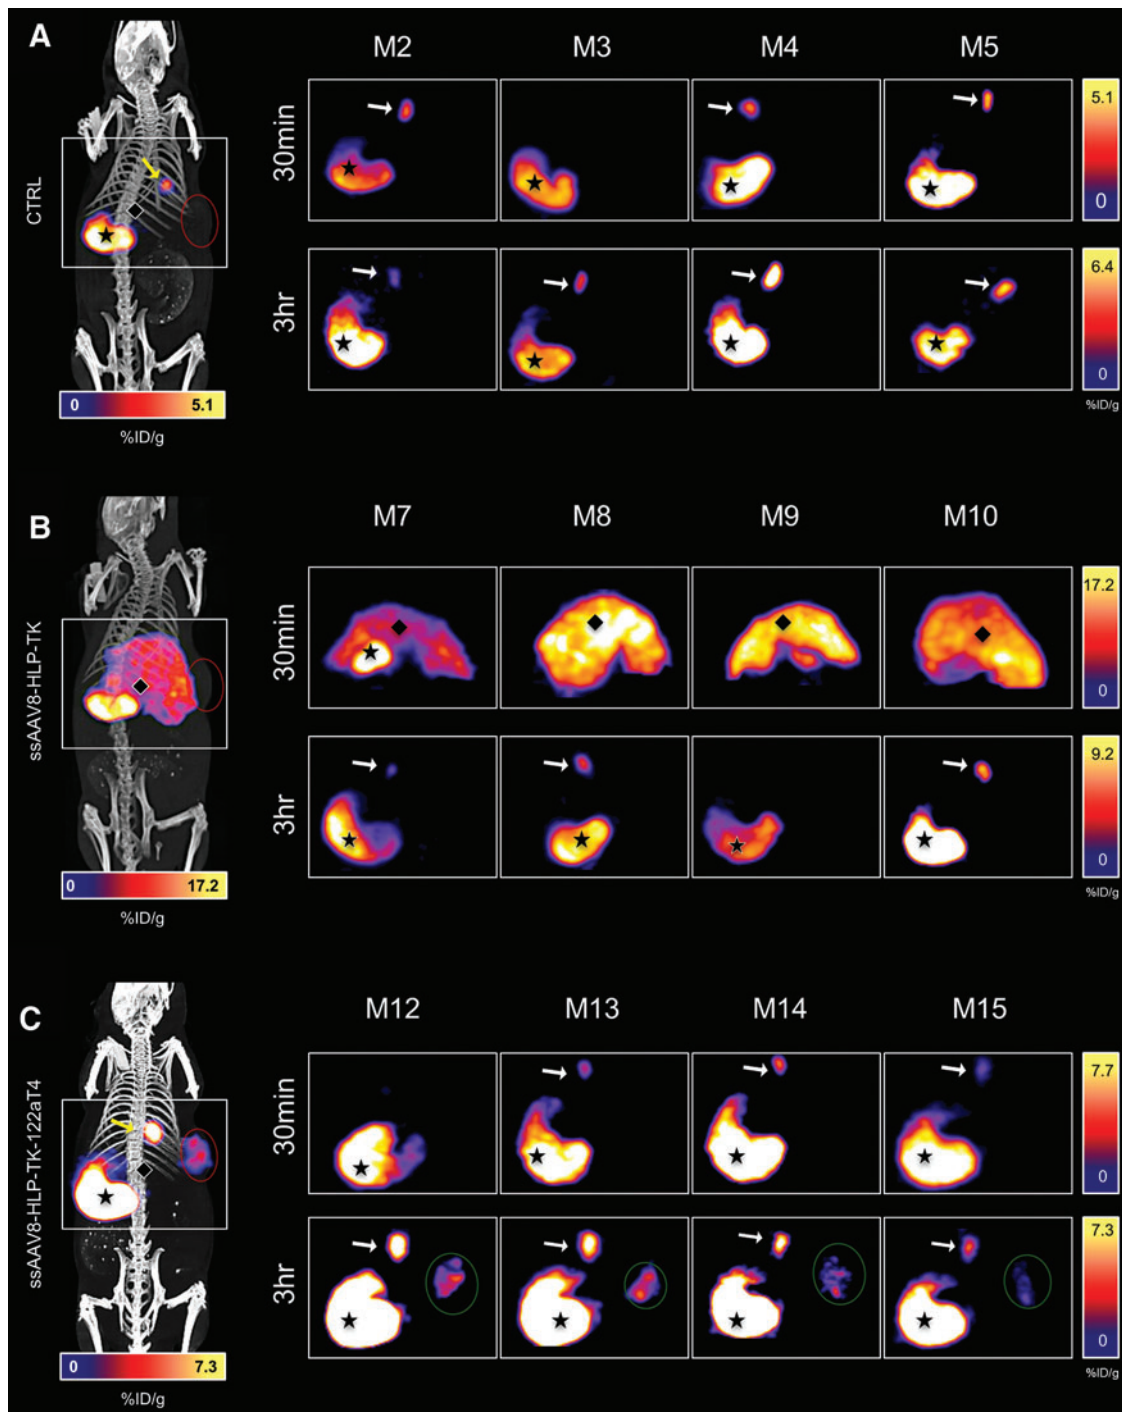

**SUPPLEMENTARY FIG. S7.** SPECT-CT imaging. NOD/SCID mice bearing human SK-Hep-1 xenografts were transduced with (A) no vector (CTRL) ( $n=5$ ; M1–M5), (B) ssAAV8-HLP-TK vector ( $n=5$ ; M6–M10), or (C) ssAAV8-HLP-TK-122aT4 vector ( $n=5$ ; M11–M15). Four days after tail vein administration of vectors, SPECT-CT images were acquired 30 min and 3 hr after iv injection of [ $^{125}$ I]FIAU. SPECT imaging ranged between lower chests to mid-abdomen. Color bars represent radiotracer uptake in units of %ID/g, with yellow corresponding to the highest activity and blue to the lowest activity. Images are maximum intensity projections. The green circles indicate the xenograft; star, stomach; diamonds, liver; and arrows, gallbladder.
