# Supplementary material
Source: PubMed Central journal article supplement (PMC4326028)
Supplement: Supp_Fig8.pdf [file Supp_Fig8.pdf]

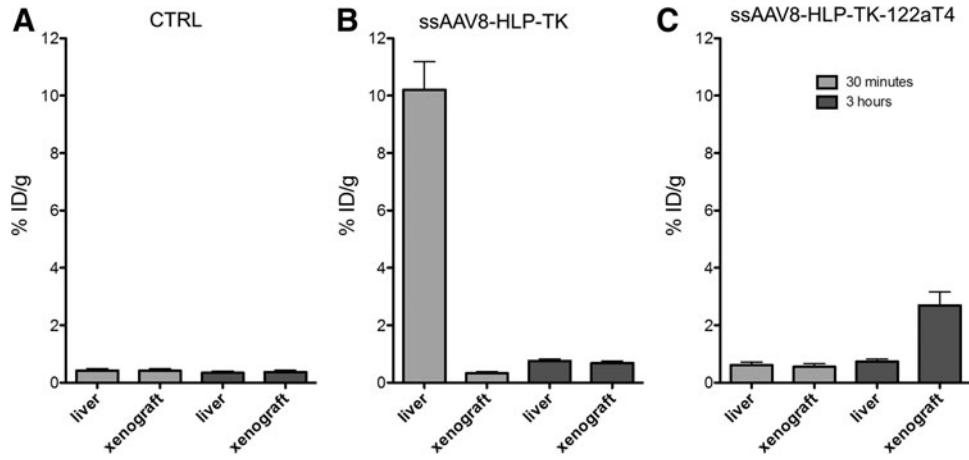

**SUPPLEMENTARY FIG. S8.** Quantitative analysis of SPECT imaging comparing [125I]FIAU uptake in livers and tumors of animals transduced with (A) no vector (CTRL), (B) ssAAV8-HLP-TK vector, or (C) ssAAV8-HLP-TK-122aT4 vector. Bar charts showing 3-dimensional volume-of-interest analysis of [125I]FIAU uptake in the livers and tumors at 30 min and 3 hr after [125I]FIAU injection.
