# Supplementary material
Source: PubMed Central journal article supplement (PMC4326028)
Supplement: Supp_Table1.pdf [file Supp_Table1.pdf]

## Supplementary Data

SUPPLEMENTARY TABLE S1. ASSESSMENT OF HEPATOTOXICITY

| Cohort               | GCV | 2nd    |      | 3rd  |      | 5th     |       | 8th      |         |
|----------------------|-----|--------|------|------|------|---------|-------|----------|---------|
| ssAAV8-HLP-TK        | -   | 24.0 ± | 2.83 | 30 ± | 2.83 | 23.5 ±  | 3.54  | 39.0 ±   | 14.00   |
|                      | +   | 26.0 ± | 4.24 | 38 ± | 7.07 | 176.0 ± | 31.11 | 2899.6 ± | 1196.53 |
| ssAAV8-HLP-TK-122aT4 | -   | 20.5 ± | 3.54 | 24 ± | 5.66 | 19.3 ±  | 3.06  | 19.0 ±   | 2.16    |
|                      | +   | 28.5 ± | 0.71 | 23 ± | 8.49 | 20.5 ±  | 3.54  | 55.0 ±   | 25.06   |

Animals from each cohort were bled at 2, 3, 5, and 8 days after GCV treatment. Blood samples were collected by tail vein bleeding into a coagulant containing tube, and aspartate aminotransferase (AST) activities were measured using a Beckman Coulter AU680 clinical chemistry analyzer.
